# Supplementary material
Source: PubMed Central journal article supplement (PMC3950894)
Supplement: NIHMS539170-supplement-1.pdf [file NIHMS539170-supplement-1.pdf]

## Supplementary figure S1

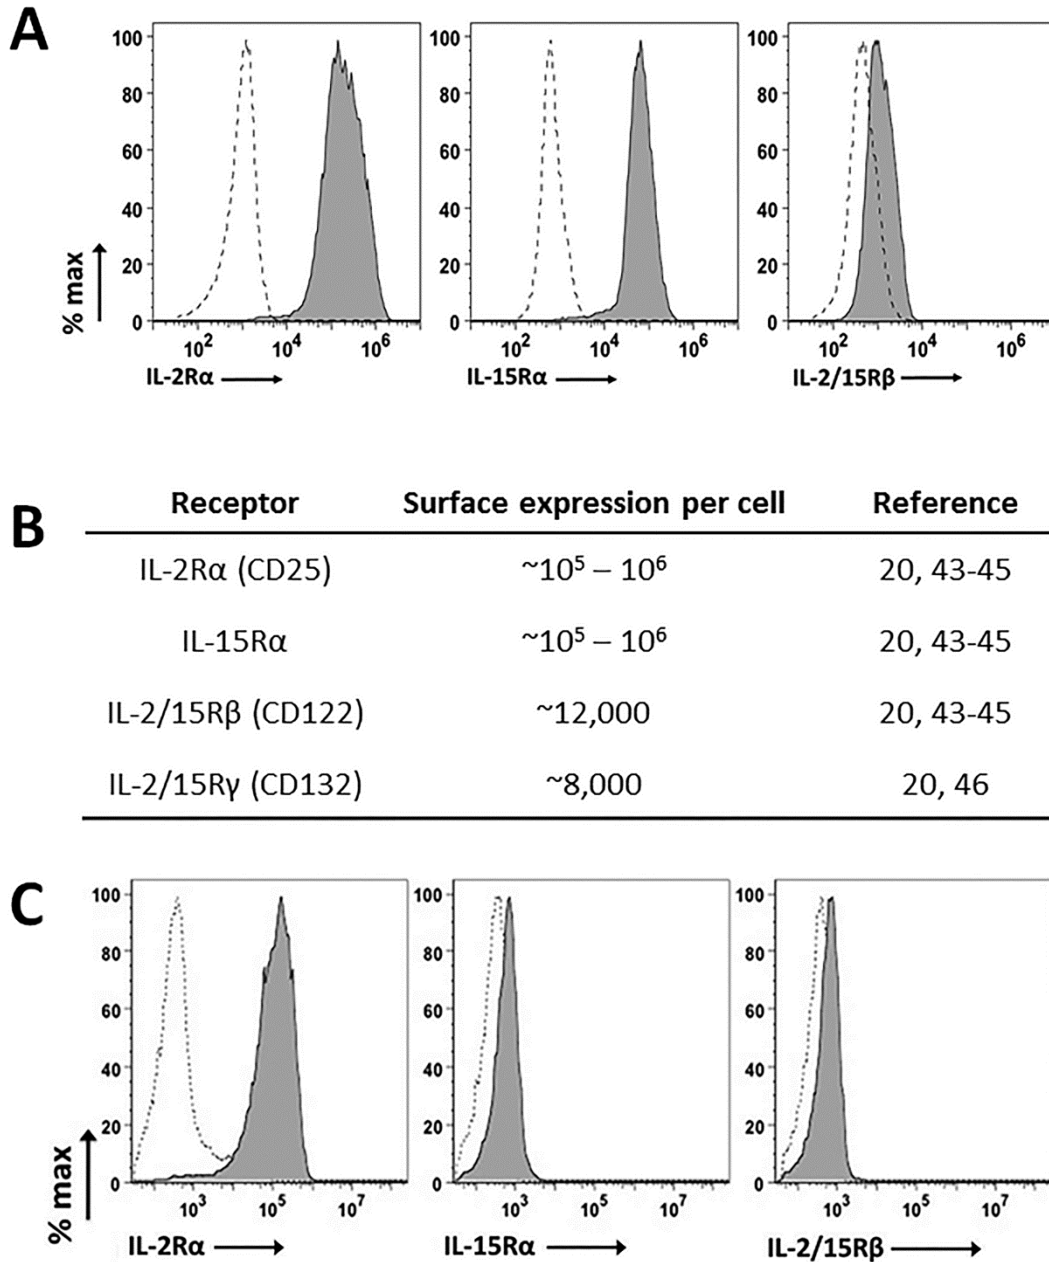

**Supplementary figure S1. Expression of IL-2/15 receptor chains on F15R-Kit cells and primary human lymphocytes.** (A) Flow cytometry histograms of IL-2R $\alpha$ , IL-15R $\alpha$ , and IL-2/15R $\beta$  chain expression on surfaces of F15R-Kit cells. (B) Surface expression levels of IL-2/15R chains on F15R-Kit cells. F15R-Kit cells express equivalent levels of IL-2R $\alpha$  and IL-15R $\alpha$  chains. The  $\alpha$ -chains are vastly over-expressed relative to the  $\beta$  and the  $\gamma_c$  chains. (C) Surface expression of IL-2/15 receptor chains in activated primary human CD4<sup>+</sup> T lymphocytes. Primary CD4<sup>+</sup> T cells were activated with anti-CD3/anti-CD28 for 48h and the surface expression of IL-2R $\alpha$ , IL-15R $\alpha$ , and the  $\beta$ -chain were measured through flow cytometry. Dotted histograms represent unstimulated cells and solid histograms represent cells stimulated with 10 $\mu$ g/ml anti-CD3 and 0.6 $\mu$ g/ml anti-CD28 antibodies.
