# Supplementary material
Source: PubMed Central journal article supplement (PMC3950894)
Supplement: NIHMS539170-supplement-2.pdf [file NIHMS539170-supplement-2.pdf]

## Supplementary figure S2

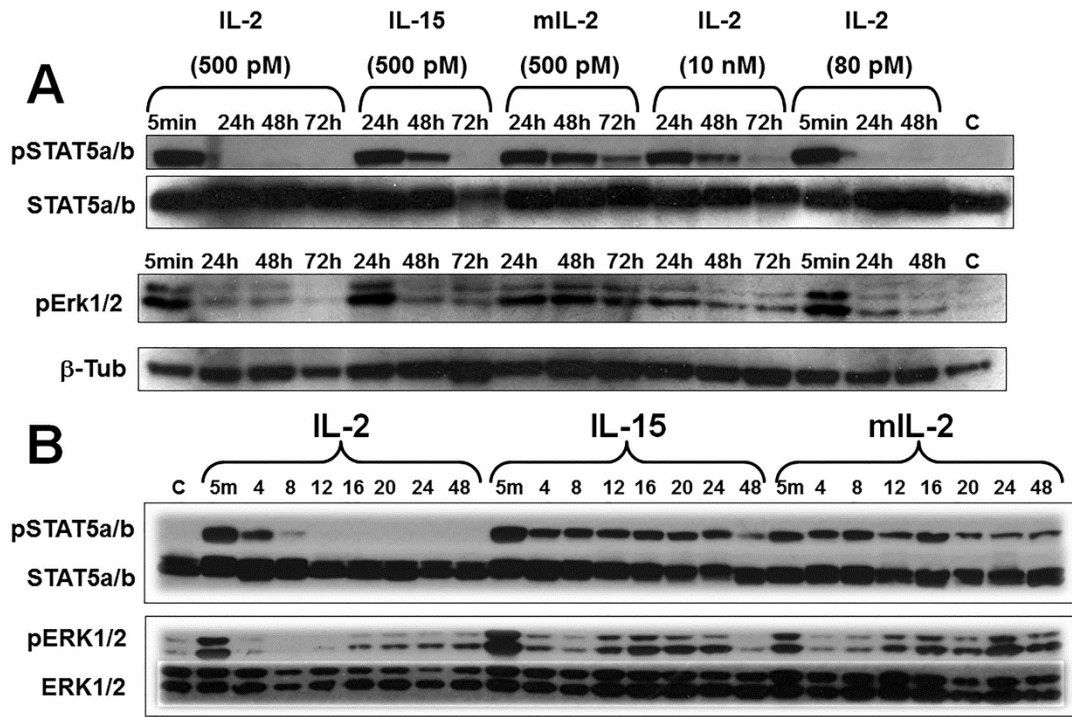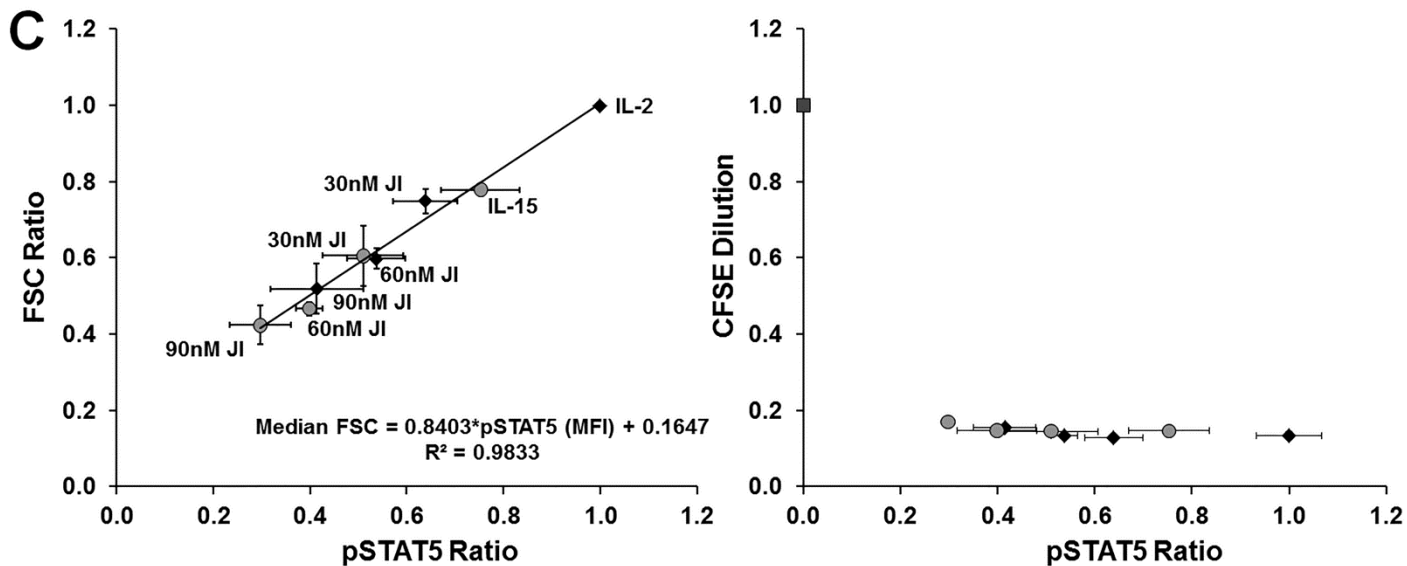

**Supplementary figure S2. Differences in duration of IL-2/15R signaling triggered by IL-2 and IL-15 in a pulse setting (A-B), and the direct correlation between IL-2/15R signal strength and cell size (C).** (A) Western blots showing levels of pSTAT5 and pERK in F15R-Kit cells pulsed with the indicated doses of IL-2, IL-15, and mIL-2. F15R-Kit cells were pulsed with IL-2, IL-15, and mIL-2 and cell lysates for western blot analysis were prepared at the indicated time-points after cytokine withdrawal. (B) A more detailed time-course of pSTAT5 and pERK levels in F15R-Kit cells pulsed with 500pM of IL-2, IL-15, or mIL-2. “C” denotes staining for unstimulated cells in both parts A and B. (C) FSC vs. pSTAT5 levels (left panel), and CFSE dilution vs. pSTAT5 levels (right panel) of F15R-Kit cells cultured with various doses of JI and 500pM IL-2 (black diamonds) or 500pM IL-15 (gray circles) 96h after cytokine addition. Gray Square in CFSE vs. pSTAT5 plot represents unstimulated cells. Data represent an average of 3 separate experiments and error bars represent  $\pm$  SD. IL-2/15R signal strength is a superior indicator of F15R-Kit cell size and proliferation compared to cytokine identity or dose.
